# Supplementary material
Source: PubMed Central journal article supplement (PMC8609462)
Supplement: jamaneurol-e214222-s001.pdf [file jamaneurol-e214222-s001.pdf]

## Supplementary Online Content

Gonzalez MC, Ashton NJ, Gomes BF, et al; European–Dementia With Lewy Bodies (E-DLB) Consortium. Association of plasma p-tau181 and p-tau231 concentrations with cognitive decline in patients with probable dementia with Lewy bodies. *JAMA Neurol*. Published online November 22, 2021. doi:10.1001/jamaneurol.2021.4222

### **eMethods.**

**eTable 1.** Overview of Diagnostic Groups According to Centers

**eTable 2.** Overview of Plasma Sample Collection, Handling, and Storage and CSF A $\beta$ 42 Cutoff Values

**eTable 3.** Analytical Performance of the p-tau181 and p-tau231 Assays

**eTable 4.** MMSE Average Change per Group for Each Increased Unit (pg/mL) of Plasma p-tau at Baseline

**eFigure 1.** Flowchart of Number of DLB Patients Completing Annual Follow-up Assessments

**eFigure 2.** Plasma p-tau231 and p-tau181 Performance Across Confirmed AD Pathology Based on Reduced A $\beta$ 42 on CSF in DLB

### **eReferences.**

This supplementary material has been provided by the authors to give readers additional information about their work.

## **eMethods.**

### **Diagnostic Examination program**

We diagnosed probable DLB using the International Consensus Criteria<sup>1</sup>. Based on the clinical examination, we evaluated the core diagnostic features (fluctuating cognition, REM sleep abnormalities, Parkinsonism, and recurrent visual hallucinations) as previously described<sup>2-5</sup>. An abnormal dopamine transporter SPECT in 88 patients supported the diagnosis. PD cases fulfilled UK Brain Bank criteria<sup>6</sup> and AD cases were defined according to the most recent international consensus criteria<sup>7</sup>. Local reference values for CSF A $\beta$ 42 concentrations are in [supplementary table 2](#). Healthy controls were subjects without any neurodegenerative disease. Participants with acute delirium, terminal illness, those recently diagnosed with a major somatic illness, and patients with other previous major psychiatric or neurological disorders were excluded from the study as well as patients with a clinical diagnosis of AD but with normal abeta42 levels on CSF. We show the final number of included patients at each center in the [e-supplementary table 1](#).

### **Phosphorylated tau blood measurements**

Plasma samples were collected in each center. Details of collection procedures in each center are available in [e-supplementary table 2](#). All plasma p-tau biomarkers were assessed using in-house Simoa methods on the HD-X instrument (Quanterix) at the Clinical Neurochemistry Laboratory Sahlgrenska University Hospital, Mölndal, Sweden as previously reported<sup>8,9</sup>. The analytical variation of the internal quality control (iQC) samples were <10% for p-tau181 and p-tau231 across the whole study ([e-supplementary table 3](#)). All measurements were performed using one batch of reagents and randomized samples with the analysts blinded to clinical data. We excluded plasma values under the lower limit of quantification (LLOQ).

### **Statistics**

All statistical analyses were performed using SPSS 23.0 (IBM Corp., Armonk, NY) and R (4.0.5) statistical software. We reported baseline characteristics of the cohorts using proportions for categorical variables, means and standard deviations for continuous variables, and normality distribution assumption was checked with the Shapiro-Wilk test. For sex groups, we used the Chi-squared test. We estimated the effect size of the differences with Cohen's d (d). We considered P-value statistically significant at 0.05.

**eTable 1.** Overview of Diagnostic Groups According to Centers

| Center                                                                                                    | DLB patients | AD patients | PD patients | HC         |
|-----------------------------------------------------------------------------------------------------------|--------------|-------------|-------------|------------|
| Neuróloga at Fundació ACE Institut Català de Neurociències Aplicades Spain                                | 31           | 63          | 0           | 19         |
| Alzheimer Centre, Dept Neuro, VU Med Centre, Amsterdam                                                    | 40           | 40          | 0           | 40         |
| Department of Neuroscience and Imaging and Aging Research Centre, G. d'Annunzio University, Chieti, Italy | 22           | 6           | 0           | 0          |
| Cog Center, University of Paris                                                                           | 33           | 4           | 0           | 0          |
| University of Brescia, Italy                                                                              | 41           | 7           | 204         | 97         |
| Dept of Neurology, University Medical Center- Ljubljana, Slovenia                                         | 17           | 0           | 0           | 0          |
| Helse Stavanger - Stavanger universitetssjukehus                                                          | 5            | 1           | 0           | 1          |
| University Medical Center Göttingen-Paracelsus-Elena-Klinik                                               | 54           | 0           | 0           | 0          |
| University Hospitals Leuven                                                                               | 20           | 10          | 0           | 18         |
| Strasbourg Resource and Research Memory Centre                                                            | 108          | 76          | 0           | 30         |
| <b>Total</b>                                                                                              | <b>371</b>   | <b>207</b>  | <b>204</b>  | <b>205</b> |

Abbreviations: (DLB) Dementia with Lewy bodies, (AD) Alzheimer's disease, (PD) Parkinson's disease, (HC) Healthy control

**eTable 2.** Overview of Plasma Sample Collection, Handling, and Storage and CSF A $\beta$ 42 Cutoff Values

| Center                                                                                                    | Collection | Centrifuging                                               | Storage                                              | A $\beta$ 42 Analysis Essay                         | Cut off values [pg/mL]                    |
|-----------------------------------------------------------------------------------------------------------|------------|------------------------------------------------------------|------------------------------------------------------|-----------------------------------------------------|-------------------------------------------|
| Neuróloga at Fundació ACE Institut Català de Neurociències Aplicades Spain                                | EDTA-tubes | Centrifuged at 2000g for 10 minutes at 4°C                 | Stored in polypropylene tubes at -80°C               | Lumipulse                                           | A $\beta$ 42 < 796                        |
| Alzheimer Centre, Dept Neuro, VU Med Centre, Amsterdam.                                                   | EDTA-tubes | Centrifuged at 1800 x g for 10 minutes at room temperature | Stored in polypropylene tubes at -80°C               | INNOTEST Double sandwich ELISAs Elecsys Roche Cobas | A $\beta$ 42 < 813<br>A $\beta$ 42 < 1092 |
| Department of Neuroscience and Imaging and Aging Research Centre, G. d'Annunzio University, Chieti, Italy | EDTA-tubes | Centrifuged at 1600 rpm for 10 minutes at room temperature | Stored at -80°C within 30 minutes.                   | INNOTEST Double sandwich ELISAs                     | A $\beta$ 42: <800                        |
| Université de Paris APHP Laiboisière Cognitive Neurology Center                                           | EDTA-tubes | Centrifuged at 2000g for 20 minutes at 4°C                 | Stored in polypropylene tubes at -80°C               | INNOTEST Double sandwich ELISAs<br>Roche Cobas      | A $\beta$ 42 < 730<br>A $\beta$ 42 < 860  |
| University of Brescia, Italy.                                                                             | EDTA-tubes | Centrifuged at 1800g for 15 minutes at 4°C                 | Stored in polypropylene tubes at -80°C               | INNOTEST Double sandwich ELISAs                     | A $\beta$ 42: <650                        |
| Dept of Neurology, University Medical Center Ljubljana                                                    | EDTA-tubes | Centrifuged at 1500g for 15 minutes                        | Stored in polypropylene tubes at -80°C               | INNOTEST Double sandwich ELISAs                     | A $\beta$ 42: <550                        |
| Stavanger SUS                                                                                             | EDTA-tubes | Centrifuged at 2000g for 10 minutes at 4°C                 | Stored in polypropylene tubes at -80°C               | Biosource Europe S.A.                               | A $\beta$ 42: <482                        |
| University Medical Center Göttingen-Paracelsus-Elena-Klinik                                               | EDTA-tubes | Centrifuged at 2500g for for 10 min at 20°C                | Stored in polypropylene tubes within 30 min at -80°C | INNOTEST Double sandwich ELISAs                     | A $\beta$ 42: <450                        |
| University Hospitals Leuven                                                                               | EDTA-tubes | Centrifuged at 2880g for 10 minutes at 4°C                 | Stored in cryo tubes Nunc 1.8ml at -80°C             | No A $\beta$ 42 confirmation                        | No A $\beta$ 42 confirmation              |
| Strasbourg Resource and Research Memory Centre                                                            | EDTA-tubes | Centrifuged at 1700g for 15 minutes at 4°C                 | Stored in polypropylene tubes at -80°                | INNOTEST Double sandwich ELISAs                     | A $\beta$ 42: <500                        |

**Abbreviations: (DLB) dementia with Lewy bodies, (A $\beta$ 42) amyloid- $\beta$ 42, (EDTA) ethylenediamine tetraacetic acid, (RPM) revolutions per minute. Samples were shipped from each center to Sweden by a competent courier on sufficient dry ice**

**eTable 3.** Analytical Performance of the p-tau181 and p-tau231 Assays

|          | <b>iQC values</b> | <b>With-in run %<br/>CV</b> | <b>Between run %<br/>CV</b> |
|----------|-------------------|-----------------------------|-----------------------------|
| p-tau181 | 36.5 pg/mL        | 4.2%                        | 4.7%                        |
|          | 20.9 pg/mL        | 5.2%                        | 5.7%                        |
|          | 17.8 pg/mL        | 3.9%                        | 6.4%                        |
| p-tau231 | 25.5 pg/mL        | 6.5%                        | 6.5%                        |
|          | 16.2 pg/mL        | 6.5%                        | 7.5%                        |
|          | 7.7 pg/mL         | 5.7%                        | 8.8%                        |

**Abbreviations:** (pg/mL) picograms per milliliter, (iQC) Internal quality control, (CV) coefficient of variation

**eTable 4.** MMSE Average Change per Group for Each Increased Unit (pg/mL) of Plasma p-tau at Baseline

| Groups | MMSE Average change |                  |                |                  |
|--------|---------------------|------------------|----------------|------------------|
|        | p-tau181 pg/ml      | CI 95%           | p-tau231 pg/ml | CI 95%           |
| AD     | -0.095              | [-0.126, -0.069] | -0.170         | [-0.209, -0.135] |
| DLB    | -0.092              | [-0.129, -0.060] | -0.166         | [-0.216, -0.122] |
| HC     | -0.044              | [-0.074, -0.022] | -0.083         | [-0.127, -0.049] |
| PD     | -0.053              | [-0.082, -0.032] | -0.097         | [-0.135, -0.065] |

Abbreviations: (MMSE) Mini-Mental State Examination, (DLB) Dementia with Lewy bodies, (AD) Alzheimer’s disease, (PD) Parkinson’s disease, (HC) Healthy control, (CI) Confidence interval

**eFigure 1.** Flowchart of Number of DLB Patients Completing Annual Follow-up Assessments

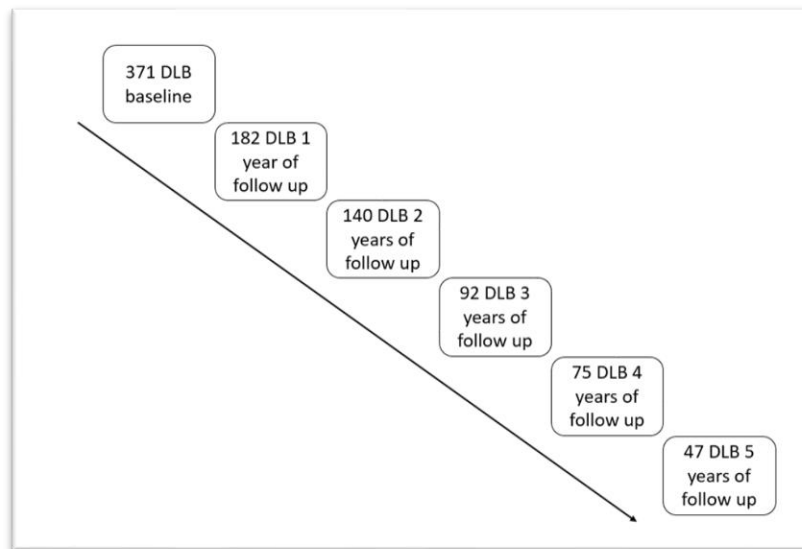

**Abbreviations: (DLB) Dementia with Lewy bodies**

**eFigure 2.** Plasma p-tau231 and p-tau181 Performance Across Confirmed AD Pathology  
Based on Reduced A $\beta$ 42 on CSF in DLB

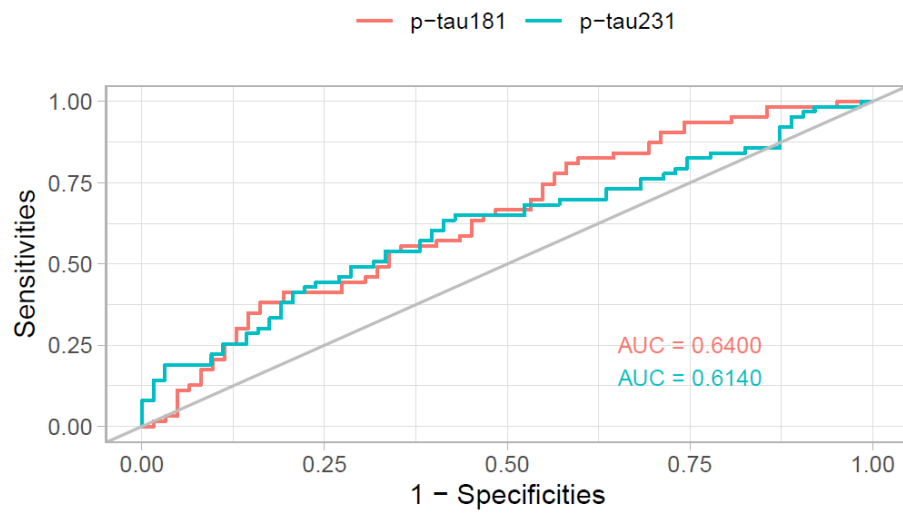

The AUC values of the ROC curves indicate the overall biomarker performance across confirmed AD pathology based on reduced A $\beta$ 42 on CSF in DLB. The change in the AUC of both biomarkers was not statistically significant.

Abbreviations: (AUC) Area under the curve, (CSF) Cerebrospinal fluid



## eReferences.

1. McKeith IG, Boeve BF, Dickson DW, et al. Diagnosis and management of dementia with Lewy bodies: Fourth consensus report of the DLB Consortium. *Neurology*. 2017;89(1):88-100.
2. Cummings JL, Mega M, Gray K, Rosenberg-Thompson S, Carusi DA, Gornbein J. The Neuropsychiatric Inventory: comprehensive assessment of psychopathology in dementia. *Neurology*. 1994;44(12):2308-2314.
3. Ferman TJ, Smith GE, Boeve BF, et al. DLB fluctuations: specific features that reliably differentiate DLB from AD and normal aging. *Neurology*. 2004;62(2):181-187.
4. Boeve BF, Molano JR, Ferman TJ, et al. Validation of the Mayo Sleep Questionnaire to screen for REM sleep behavior disorder in an aging and dementia cohort. *Sleep Med*. 2011;12(5):445-453.
5. Fahn S ER. UPDRS program members Parkinson's Disease Rating Scale. In: Fahn S, Marsden CD, Goldstein M, Calne DB (eds) Recent developments in Parkinson's disease. *Macmillanm Healthcare Information , Florham Park*. 1987;2:153–163.
6. Hughes AJ, Daniel SE, Kilford L, Lees AJ. Accuracy of clinical diagnosis of idiopathic Parkinson's disease: a clinico-pathological study of 100 cases. *J Neurol Neurosurg Psychiatry*. 1992;55(3):181-184.
7. World Health O. ICD-10 : international statistical classification of diseases and related health problems : tenth revision. In. 2nd ed ed. Geneva: World Health Organization; 2004.
8. Karikari TK, Pascoal TA, Ashton NJ, et al. Blood phosphorylated tau 181 as a biomarker for Alzheimer's disease: a diagnostic performance and prediction modelling study using data from four prospective cohorts. *Lancet Neurol*. 2020;19(5):422-433.
9. Ashton NJ, Pascoal TA, Karikari TK, et al. Plasma p-tau231: a new biomarker for incipient Alzheimer's disease pathology. *Acta Neuropathologica*. 2021.
