# Supplementary material
Source: PubMed Central journal article supplement (PMC8609462)
Supplement: jamaneurol-e214222-s002.pdf [file jamaneurol-e214222-s002.pdf]

\*Indicates required information. Only first name, last name, and suffix will appear in PubMed.

| <b>*Group Name(s): European–Dementia With Lewy Bodies (E-DLB) Consortium</b> |                   |                              |                  |                                                                                                        |                                          |                                                         |                                                                                            |
|------------------------------------------------------------------------------|-------------------|------------------------------|------------------|--------------------------------------------------------------------------------------------------------|------------------------------------------|---------------------------------------------------------|--------------------------------------------------------------------------------------------|
| <b>*First Name and Middle Initial(s)</b>                                     | <b>*Last Name</b> | <b>*Suffix (eg, Jr, III)</b> | Academic Degrees | Institution                                                                                            | Location (city, state/province, country) | Role or Contribution, eg, chair, principal investigator | Group (if more than 1 Group listed in the byline and/or Subgroup (eg, Steering Committee)) |
| Claudia                                                                      | Carrarini         |                              | MD               | Department of Neuroscience, Imaging, and Clinical Sciences, G. d'Annunzio University of Chieti-Pescara | Chieti                                   |                                                         |                                                                                            |
| Mirella                                                                      | Russo             |                              | MD               | Department of Neuroscience, Imaging, and Clinical Sciences, G. d'Annunzio University of Chieti-Pescara | Chieti                                   |                                                         |                                                                                            |
| Agathe                                                                       | VRILLON           |                              | MD               | Centre de Neurologie Cognitive, GHU APHP Nord Hôpital Lariboisière Fernand-Widal, Paris, France        | Paris, France                            |                                                         |                                                                                            |
| Emmanuel                                                                     | COGNAT            |                              | MD, PhD          | Centre de Neurologie Cognitive, GHU APHP Nord Hôpital Lariboisière Fernand-Widal, Paris, France        | Paris, France                            |                                                         |                                                                                            |
| Julien                                                                       | DUMURGIER         |                              | MD, PhD          | Centre de Neurologie Cognitive, GHU APHP Nord Hôpital Lariboisière Fernand-Widal, Paris, France        | Paris, France                            |                                                         |                                                                                            |
| Claire                                                                       | HOURREGUE         |                              | MD               | Centre de Neurologie Cognitive, GHU APHP Nord Hôpital Lariboisière Fernand-Widal, Paris, France        | Paris, France                            |                                                         |                                                                                            |
| Sinead                                                                       | GAUBERT           |                              | MD               | Centre de Neurologie Cognitive, GHU APHP Nord Hôpital Lariboisière Fernand-Widal, Paris, France        | Paris, France                            |                                                         |                                                                                            |

## Supplemental Online Content: Nonauthor Collaborators

\*Indicates required information. Only first name, last name, and suffix will appear in PubMed.

| *First Name and Middle Initial(s) | *Last Name  | *Suffix (eg, Jr, III) | Academic Degrees | Institution                                                                                     | Location (city, state/province, country) | Role or Contribution, eg, chair, principal investigator | Group (if more than 1 Group listed in the byline) and/or Subgroup (eg, Steering Committee) |
|-----------------------------------|-------------|-----------------------|------------------|-------------------------------------------------------------------------------------------------|------------------------------------------|---------------------------------------------------------|--------------------------------------------------------------------------------------------|
| Maximilien                        | PORCHÉ      |                       | MD               | Centre de Neurologie Cognitive, GHU APHP Nord Hôpital Lariboisière Fernand-Widal, Paris, France | Paris, France                            |                                                         |                                                                                            |
| Matthieu                          | LILAMAND    |                       | MD, PhD          | Centre de Neurologie Cognitive, GHU APHP Nord Hôpital Lariboisière Fernand-Widal, Paris, France | Paris, France                            |                                                         |                                                                                            |
| Charlotte                         | Teunissen   |                       | PhD              | Amsterdam University Medical Centers                                                            | Amsterdam, the Netherlands               |                                                         |                                                                                            |
| Katharina                         | Bolsewig    |                       | MSc              | Amsterdam University Medical Centers                                                            | Amsterdam, the Netherlands               |                                                         |                                                                                            |
| Pierre                            | Anthony     |                       |                  |                                                                                                 | Strasbourg, France                       |                                                         |                                                                                            |
| Benjamin                          | Cretin      |                       |                  |                                                                                                 | Strasbourg, France                       |                                                         |                                                                                            |
| Catherine                         | Demunyck    |                       |                  |                                                                                                 | Strasbourg, France                       |                                                         |                                                                                            |
| Catherine                         | Martin      |                       |                  |                                                                                                 | Strasbourg, France                       |                                                         |                                                                                            |
| Candice                           | Muller      |                       |                  |                                                                                                 | Strasbourg, France                       |                                                         |                                                                                            |
| Nathalie                          | Philippi    |                       |                  |                                                                                                 | Strasbourg, France                       |                                                         |                                                                                            |
| Alix                              | Ravier      |                       |                  |                                                                                                 | Strasbourg, France                       |                                                         |                                                                                            |
| Anne                              | Botzung     |                       |                  |                                                                                                 | Strasbourg, France                       |                                                         |                                                                                            |
| Timothée                          | Albasser    |                       |                  |                                                                                                 | Strasbourg, France                       |                                                         |                                                                                            |
| Emmanuelle                        | Epp-Ehrhard |                       |                  |                                                                                                 | Strasbourg, France                       |                                                         |                                                                                            |
| Guillaume                         | Jung        |                       |                  |                                                                                                 | Strasbourg, France                       |                                                         |                                                                                            |
| Jeanne                            | Merignac    |                       |                  |                                                                                                 | Strasbourg, France                       |                                                         |                                                                                            |
| Laetitia                          | Monjoin     |                       |                  |                                                                                                 | Strasbourg, France                       |                                                         |                                                                                            |
| Koen                              | Poesen      |                       | PhD              | University Hospitals Leuven                                                                     | Leuven, Belgium                          |                                                         |                                                                                            |
| Isabelle                          | Cleynen     |                       | PhD              | KU Leuven                                                                                       | Leuven, Belgium                          |                                                         |                                                                                            |

## Supplemental Online Content: Nonauthor Collaborators

\*Indicates required information. Only first name, last name, and suffix will appear in PubMed.

| *First Name and Middle Initial(s) | *Last Name | *Suffix (eg, Jr, III) | Academic Degrees | Institution                                                                                                                                                                                              | Location (city, state/province, country) | Role or Contribution, eg, chair, principal investigator | Group (if more than 1 Group listed in the byline) and/or Subgroup (eg, Steering Committee) |
|-----------------------------------|------------|-----------------------|------------------|----------------------------------------------------------------------------------------------------------------------------------------------------------------------------------------------------------|------------------------------------------|---------------------------------------------------------|--------------------------------------------------------------------------------------------|
| Mercè                             | Boada      |                       | MD, PhD, Prof    | Ace Alzheimer Center Barcelona, Institut Català de Neurociències Aplicades, Universitat Internacional de Catalunya-Barcelona, Centro de Investigación en Red-Enfermedades Neurodegenerativas (CIBERNED). | Barcelona, Spain                         |                                                         |                                                                                            |
| Adela                             | Orellana   |                       | PhD              | Ace Alzheimer Center Barcelona, Institut Català de Neurociències Aplicades, Universitat Internacional de Catalunya-Barcelona, Centro de Investigación en Red-Enfermedades Neurodegenerativas (CIBERNED). | Barcelona, Spain                         |                                                         |                                                                                            |
